# Supplementary material
Source: PubMed Central journal article supplement (PMC4267340)
Supplement: pnas.201411620SI.pdf [file pnas.201411620SI.pdf]

# Supporting Information

Gainaru et al. 10.1073/pnas.1411620111

## Difference in Relaxation Time of ASW and LDA Water

Comparison of relaxation times obtained for LDA water and ASW (Fig. 1) reveals a difference of almost one order of magnitude at the same temperature, with the ASW sample showing slower relaxation for both H-ASW and D-ASW. LDA is a compact material of surface area  $<1 \text{ m}^2/\text{g}$ , whereas ASW is a highly microporous, fluffy material with a surface area of several hundred square meters per gram at low temperatures ( $<77 \text{ K}$ ) that can efficiently take up impurities from the background gas (1, 2). The network of the micropores in ASW then collapses upon heating to  $>130 \text{ K}$ , and some impurities remain irreversibly trapped within the bulk of ASW (3). This difference in surface-to-volume ratio and some impurities may be at the origin of the observed differences between LDA and ASW (Fig. 1).

## Estimates of $T_{\text{onset}}$ from Rate-Dependent Dielectric Measurements of LDA

To compare the dielectric results with the DSC measurements the complex permittivity  $\epsilon^*$  of protonated and deuterated LDA was recorded not only at constant temperatures (Fig. S2) but, in addition, at a constant frequency of 1 Hz for various heating rates  $q$ . In Fig. 2 and Fig. S3 the results for the imaginary part of  $\epsilon^*$ , normalized by its maximum value,  $\epsilon''/\epsilon''_{\text{max}}$ , are plotted as a function

of temperature. Using a procedure similar to the one used for estimating  $T_g$  from calorimetric data, we extracted dielectric onset temperatures,  $T_{\text{onset}}$ , as the intersection point of the linear increase of  $\epsilon''/\epsilon''_{\text{max}}$  at  $T > T_{\text{onset}}$  with a baseline,  $\epsilon''/\epsilon''_{\text{max}} = 0$ , taken to characterize the loss behavior at low temperatures. The linear increase of  $\epsilon''$  was obtained from a linear fit of the dielectric data in the range  $0.5 < \epsilon''/\epsilon''_{\text{max}} < 0.9$ . The resulting fits, extrapolated to  $\epsilon''/\epsilon''_{\text{max}} = 0$ , are shown in Fig. 2 and Fig. S3. The error bars for  $\Delta T_{\text{onset}}$  (Fig. 2G) account for the small deviations from the linear regression and for deviations occurring when the fitting range varies between  $0.3 < \epsilon''/\epsilon''_{\text{max}} < 0.9$  and  $0.7 < \epsilon''/\epsilon''_{\text{max}} < 0.9$ . The data in Fig. S3 also show that the maximum in  $\epsilon''$  vs.  $T$  is broad and smooth at high heating rate  $q$ . This maximum reflects that the condition  $2\pi\nu\tau \sim 1$  is fulfilled before the transformation to the cubic ice phase sets in. This dielectric loss maximum thus signals the presence of a relaxation process. The decay in  $\epsilon''$  observed at higher  $T$  gets sharper at heating rates  $q \leq 0.2 \text{ K/min}$ , thereby precluding a consistent determination of  $\epsilon''_{\text{max}}$  (Fig. S3). Thus, the maximum at slow heating rate might not reflect a relaxation maximum, but rather a crystallization-related loss maximum. Hence, we refrain from using the data obtained with heating rates slower than  $0.2 \text{ K/min}$  in our analysis of  $\Delta T_{\text{onset}}$ .

1. Li J (1996) Inelastic neutron scattering studies of hydrogen bonding in ices. *J Chem Phys* 105(16):6733–6755.
2. Mayer E, Pletzer R (1986) Astrophysical implications of amorphous ice – a microporous solid. *Nature* 319(6051):298–301.

3. Mitterdorfer C, et al. (2014) Small-angle neutron scattering study of micropore collapse in amorphous solid water. *Phys Chem Chem Phys* 16(30):16013–16020.

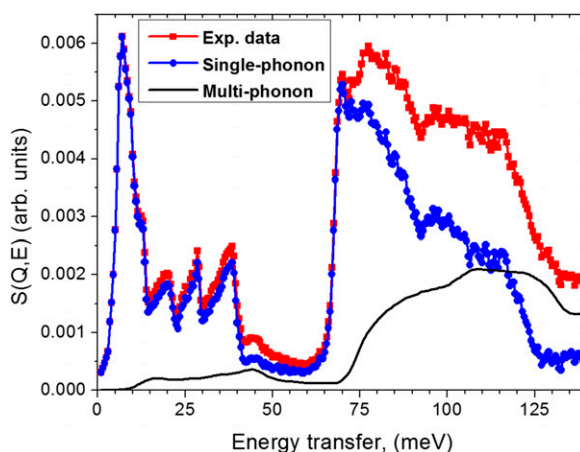

Fig. S1. Dynamical structure factor  $S(Q,E)$  for an LDA sample obtained from the INS spectra measured at  $T = 15 \text{ K}$ : the experimental spectrum (1) (red curve), calculated multiphonon (black line), and single-phonon (blue curve) contributions.







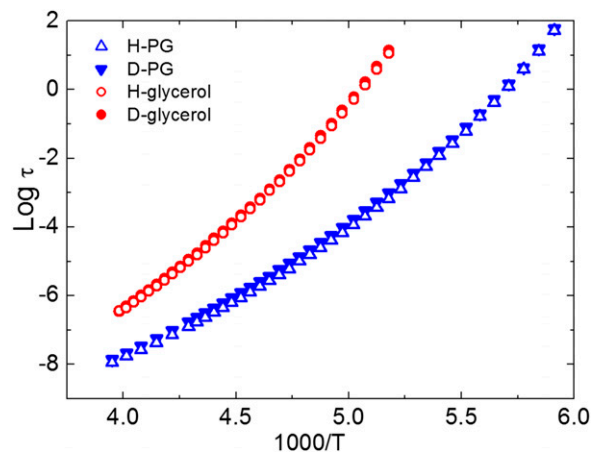

Fig. 57. Structural dynamics in propylene glycol and glycerol. An isotope effect on the glass transition in these hydrogen bonding liquids is very small,  $\Delta T_g \approx 0.1$  K for PG and  $\Delta T_g \approx 0.4$  K for glycerol (2).
